# Supplementary material for: Vitamin D, serum 25(OH)D, LL-37 and polymorphisms in a Canadian First Nation population with endemic tuberculosis
Source: PubMed Central journal article supplement (PMC4543449; doi:10.3402/ijch.v74.28952), 2015-08-19

**Supplemental Figure 1:** Serum concentrations of (A) 25(OH)D and (B) LL-37 were evaluated for potential correlations with vitamin D intake, pre- and post-vitamin D supplementation. (C) Correlation of serum concentrations of 25(OH)D and LL-37 was determined with the rate of compliance for taking vitamin D supplements.

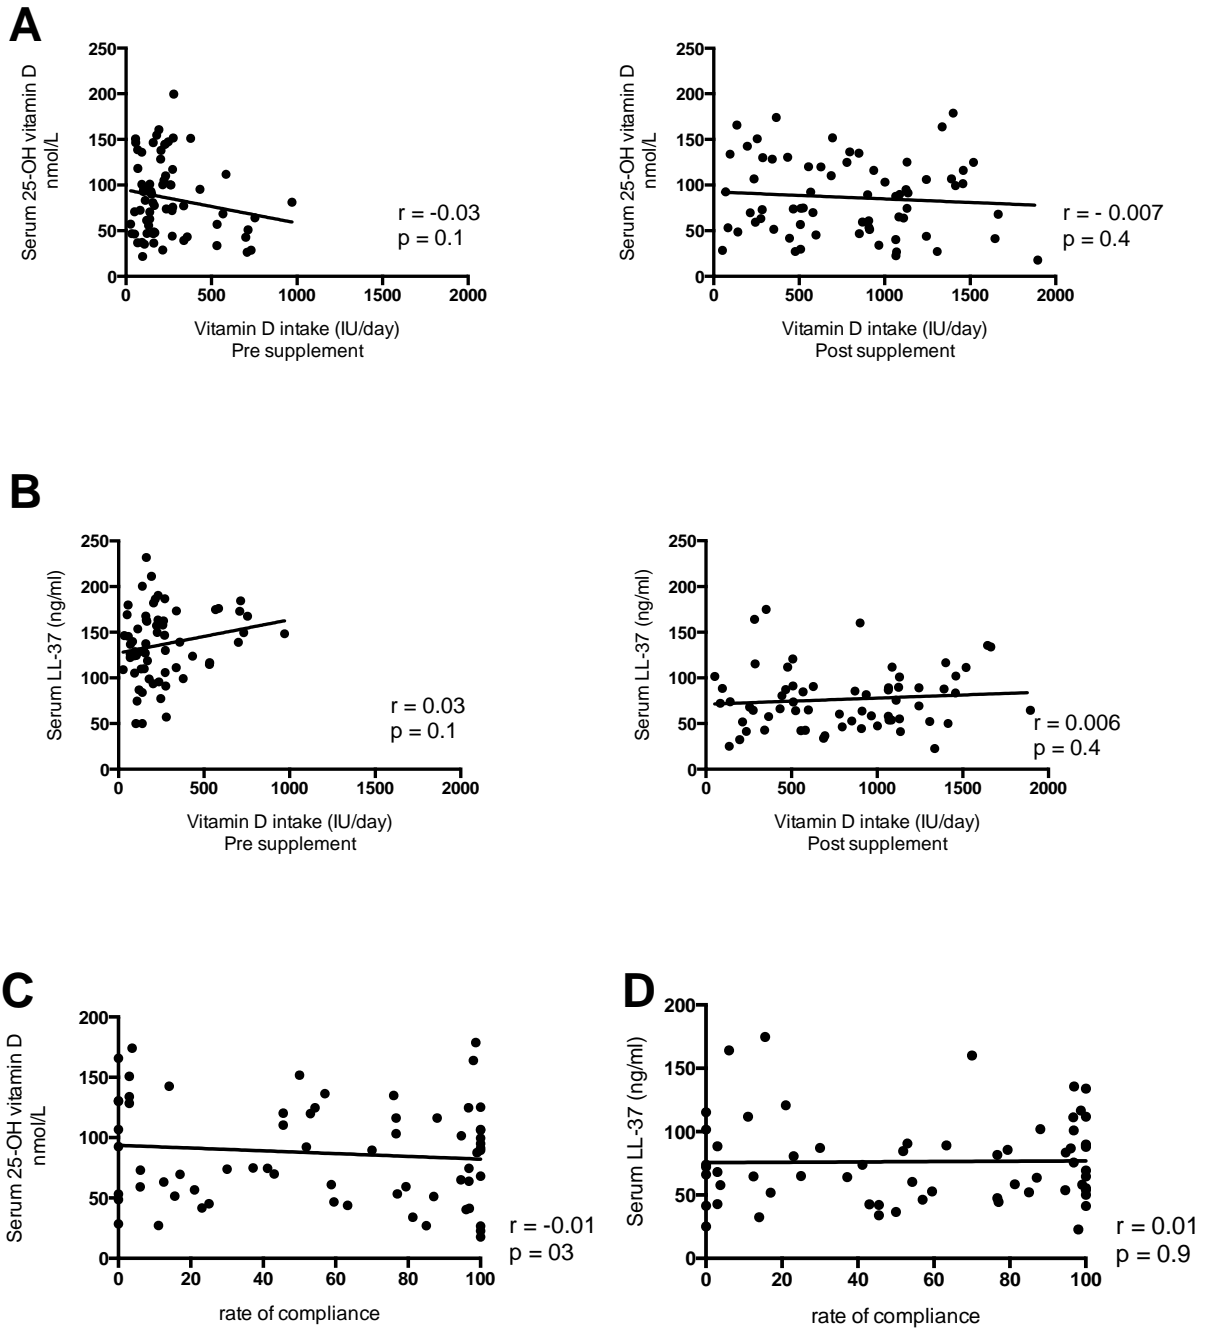

**Supplemental Figure 2:** Specific VDR SNPs were analyzed at specific four restriction sites (**A**) Fok1, (**B**) Taq1, (**C**) Apa1, and (**D**) Bsm1. The figure shows the association of the VDR SNPs with serum levels of 25(OH)D monitored pre- and post-vitamin D supplementation.

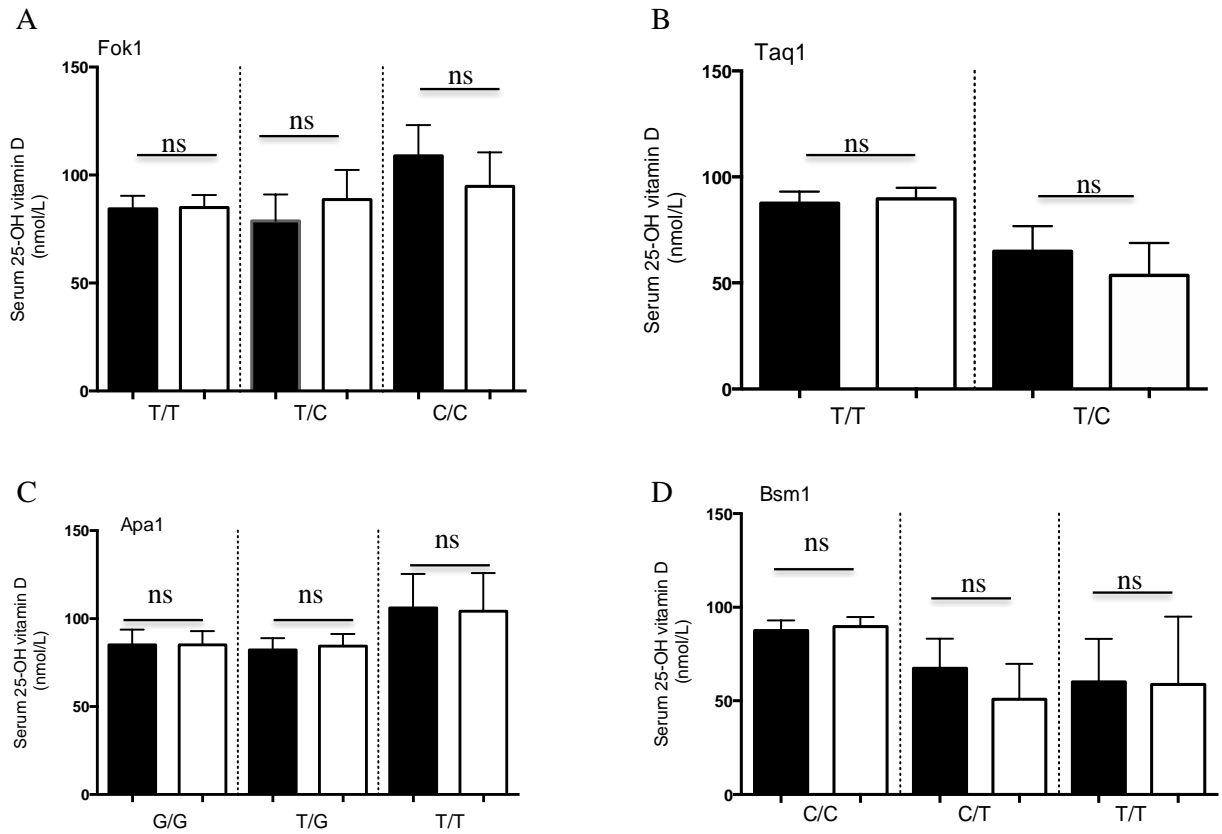

Supplement: IJCH-74-28952-s001.pdf [file IJCH-74-28952-s001.pdf]
